# Supplementary material for: The stb Operon Balances the Requirements for Vegetative Stability and Conjugative Transfer of Plasmid R388
Source: PLOS journal article supplement (doi:10.1371/journal.pgen.1002073), 2011-05-19

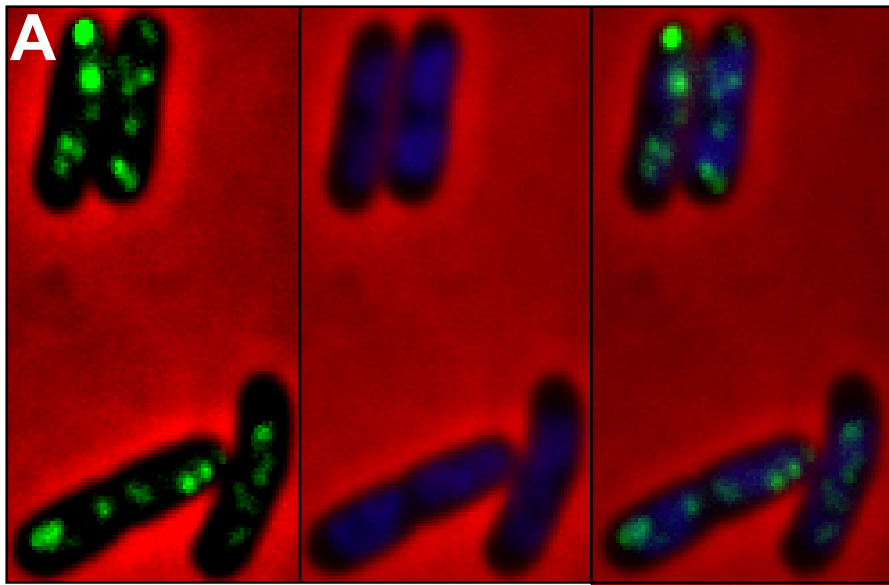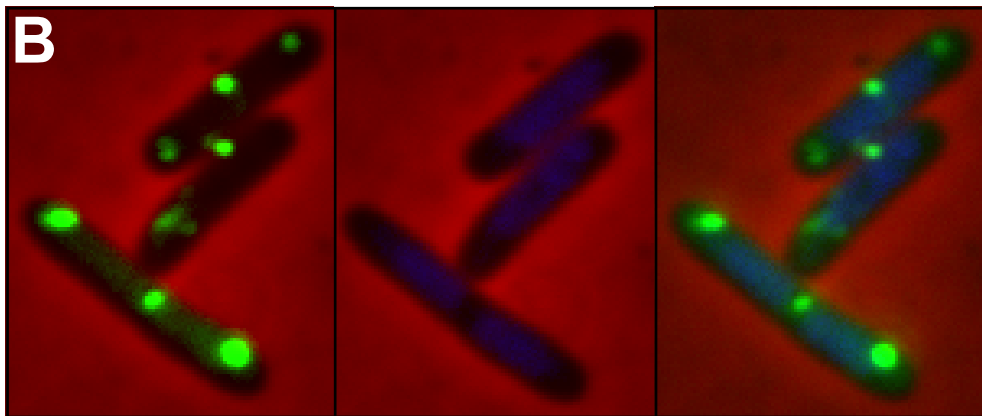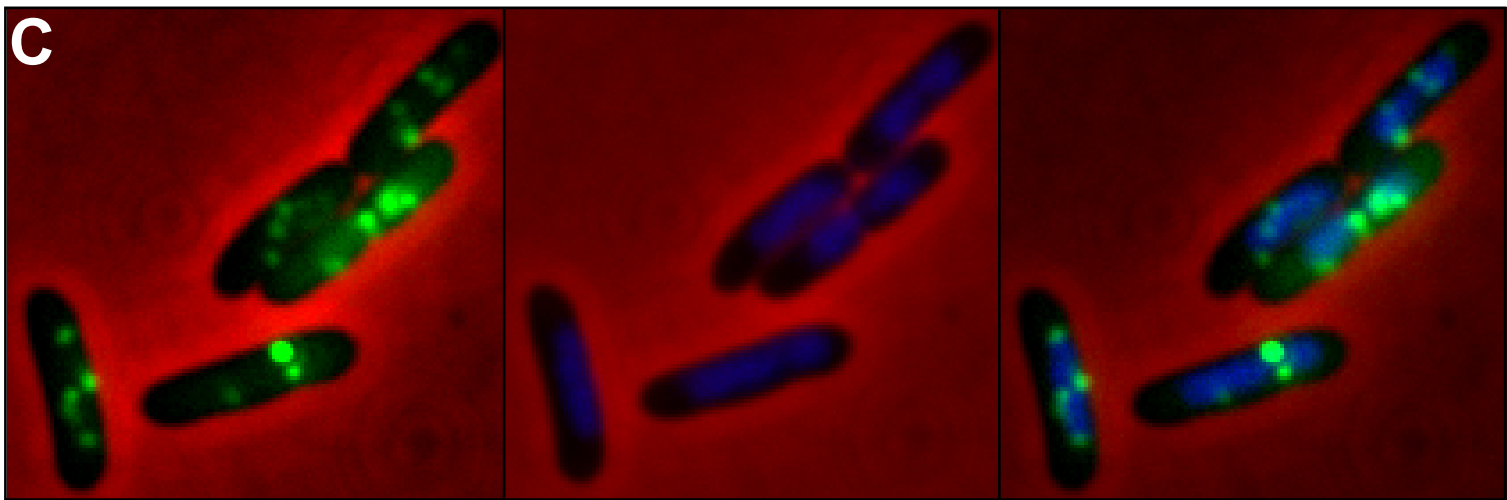

Supplement: S4 (10.1371/journal.pgen.1002073.s004) [file journal.pgen.1002073.s004]
